1    **Research Letter: Genetically determined blood pressure traits are associated with increased**  
2    **risk of aortic dissection: a Mendelian randomization study**

3    Jiawei Zhou<sup>†1</sup>, Jianfeng Lin<sup>†2</sup>, Yuehong Zheng<sup>\*1</sup>

4    <sup>1</sup>Department of Vascular Surgery, Peking Union Medical College Hospital, Chinese Academy of  
5    Medical Sciences and Peking Union Medical College, Beijing, PR China

6    <sup>2</sup>Peking Union Medical College Hospital, Chinese Academy of Medical Sciences and Peking  
7    Union Medical College, Beijing, China

8    <sup>†</sup>Authors contributed equally

9    **\*Correspondence:**

10    Yuehong Zheng

11    Department of Vascular Surgery

12    Peking Union Medical College Hospital

13    Chinese Academy of Medical Sciences & Peking Union Medical College

14    Phone number: 010-69152503

15    Fax number: +861069152503

16    [yuehongzheng@yahoo.com](mailto:yuehongzheng@yahoo.com)

17    **Running head:**

18    Causality of BP Traits on Aortic Dissection

19

20

21

22 Abstract:

23 Objective: To identify blood pressure traits influencing aortic dissection susceptibility using  
24 Mendelian randomization (MR).

25 Methods: Summary statistics of AD genome-wide association studies (GWAS) was obtained from  
26 FinnGen R5 release, which included 470 individuals with AD and 206541 controls. Firstly,  
27 inverse variance weighted (IVW) was used to calculate the overall OR for blood pressure traits.  
28 Further, directional pleiotropy and heterogeneity were tested as well as MR pleiotropy residual  
29 sum and outlier (MR-PRESSO) method.

30 Results:

31 Positive associations were observed between DBP (OR=1.13, 95%CI 1.09-1.18, P-adjusted <  
32 0.001), hypertension (OR=9.71, 95%CI 2.45-38.25, P-adjusted = 0.006) and AD. Further, there  
33 was potential causal relationship between MAP and AD (OR=1.15, 95%CI 1.02-1.30,  
34 P-unadjusted = 0.020). No significant association between SBP or PP and AD in the European  
35 populations were observed. No directional pleiotropy was observed. Heterogeneity was only  
36 detected in the genetic instruments for SBP (Cochran's Q statistics = 491.7, P = 0.010). The  
37 MR-PRESSO suggested one outlier SNP for SBP and one for PP which did not affect the result  
38 above.

39 Conclusion: In this study, we identified a forward causation between hypertension, SBP and AD.  
40 In addition, there were nominal significant causations between MAP and AD. No significant  
41 causal relationships were detected between other investigated blood pressure traits (SBP, PP) and  
42 AD.

43

44 A recent meta-analysis enrolled 8 cohort studies with a total of 2,818 cases and 4,563,501  
45 participants to investigate the association between hypertension & blood pressure elevation and  
46 aortic dissection (AD).(1) These findings were of great interest as discussed below. The summary  
47 relative risks (RRs) for hypertension were 3.07 (95% CI 2.15-4.38,  $I^2=76.7\%$ ). Furthermore, the  
48 RRs were 1.39 (95% CI: 1.16-1.66,  $I^2=47.7\%$ ) and 1.79 (95% CI: 1.51-2.12,  $I^2=57.0\%$ ) for per  
49 increase of 20 mmHg in systolic blood pressure (SBP) and per increase of 10 mmHg in diastolic  
50 blood pressure (DBP), respectively. The results indicated positive dose-related associations  
51 between elevated SBP, DBP and AD in which the effect of DBP on AD was even stronger. Due to  
52 potential confounders and reverse causation bias, observational studies could not investigate  
53 causality between hypertension and AD. With Two-Sample Mendelian randomization (MR)  
54 analysis, the influence of confounding and reverse causality could be avoided to estimate the  
55 causal effect of a risk factor (exposure) on an outcome.

56 In this MR analysis, we obtained summary statistics of AD genome-wide association studies  
57 (GWAS) from FinnGen R5 release, which included 470 individuals with AD and 206541 controls,  
58 with a total of 16,380,465 genotyped SNPs. To construct the genetic instruments for each blood  
59 pressure trait, we used GWASs conducted in large cohorts of European. Firstly, we included  
60 single-nucleotide polymorphisms (SNPs) associated with each trait at the genome-wide  
61 significance level ( $P<5\times 10^{-8}$ ), and selected the SNP with the strongest association when linkage  
62 disequilibrium was present ( $r^2>0.1$ ). Secondly, we excluded SNPs that were unavailable in the AD  
63 GWAS. Finally, the SNPs used for genetic instruments were 196, 422, 427, 54, and 11 for  
64 hypertension (2), SBP (3), DBP (3), pulse pressure (PP) (3), and mean arterial pressure (MAP) (4),  
65 respectively. We used inverse variance weighted (IVW) was used to calculate the overall OR. We

66 also performed MR-Egger (MRE) regression to assess directional pleiotropy and calculated  
67 Cochran's Q statistics to test heterogeneity test. MR pleiotropy residual sum and outlier  
68 (MR-PRESSO) method were further used to exclude potentially horizontally pleiotropic SNPs  
69 ( $P < 0.10$ ). Benjamini-Hochberg method was used to calculate multiple testing correction of  
70 P-value. P value smaller than 0.05 was considered as statistically significant. All statistical  
71 analyses were performed using R 4.0.5.

72 The corresponding F-statistics of genetic instrument for each blood pressure trait were 29.8-462.7,  
73 29.7-627.5, 29.7-815.8, 36.6-134.2, 30.5-83.3, respectively, suggesting that the instruments were  
74 unlikely to suffer from weak instrument bias. The variance explained ranged from 0.4% for PP to  
75 4.5% for DBP. Our MR study identified, for the first time, the causality between blood pressure  
76 traits and AD with the method of Mendelian Randomization (Figure 1). The strongest positive  
77 associations were observed between DBP (OR=1.13, 95%CI 1.09-1.18, P-adjusted  $< 0.001$ ),  
78 hypertension (OR=9.71, 95%CI 2.45-38.25, P-adjusted = 0.006) and AD. Moreover, there was  
79 potential causal relationship between MAP and AD (OR=1.15, 95%CI 1.02-1.30, P-unadjusted =  
80 0.020). Nevertheless, the study failed to reveal the significant association between SBP or PP and  
81 AD in the European populations. We did not find any directional pleiotropy, and only observed  
82 heterogeneity in the genetic instruments for SBP (Cochran's Q statistics = 491.7,  $P = 0.010$ ). The  
83 MR-PRESSO suggested one outlier SNP for SBP and one for PP. After excluding the outlier SNPs,  
84 the estimates were only subtly changed (SBP: OR=1.01, 95%CI 0.99-1.04, P-adjusted = 1; PP:  
85 OR=0.92, 95%CI 0.77-1.10, P-adjusted = 1), while heterogeneity for SBP-related SNPs was  
86 diminished (Cochran's Q statistics = 448.8,  $P = 0.160$ ).

87 Based on this, our MR study proved the positive causality between hypertension, DBP and AD

88 which were consistent with present epidemiological evidence.(1) However, the conclusion of  
89 causal relationship between SBP and AD was not supported by existing literature. The different  
90 roles for SBP & DBP were also observed in other cardiovascular disease awaiting further  
91 investigation.(5)

92 In conclusion, this study identified a forward causation between hypertension, SBP and AD for the  
93 first time. In addition, there were nominal significant causations between MAP and AD. No  
94 significant causal relationships were detected between other investigated blood pressure traits  
95 (SBP, PP) and AD. For the validated exposure, detailed mechanisms underlying these causations  
96 need to be investigated in future studies.

97

#### 98 **Acknowledgments**

99 None.

#### 100 **Authors' contributions**

101 YZ is responsible for substantial contributions to the conception and substantively revision. JZ is  
102 responsible for study design, data acquisition, manuscript writing, and substantively revision. JL is  
103 responsible for study design, data analysis, data interpretation, manuscript writing, and  
104 substantively revision. All the authors approved the submitted version and agreed both to be  
105 personally accountable for the author's own contributions and to ensure that questions related to  
106 the accuracy or integrity of any part of the work.

#### 107 **Funding**

108 This work is supported by the Major Research Program of Natural Science Foundation of China  
109 (51890894), Natural Science Foundation of China (81770481 and 82070492), Chinese Academy

110 of Medical Sciences, Innovation Fund for Medical Sciences (2021-I2M-C&T-A-006) and  
111 Innovation Fund for Health and Longevity in China (JC2021CL006). The funders had no role in  
112 study design, data collection and analysis, decision to publish, or preparation of the manuscript.

113 **Availability of data and materials**

114 No new data were created or analyzed in this study. All the data used in this study could be  
115 downloaded from publicly available databases or published articles.

116

117 **Declarations**

118 **Ethics approval and consent to participate:**

119 Not applicable.

120 **Consent for publication:**

121 Not applicable.

122 **Competing interests:**

123 The authors declare that they have no competing interests.

124

125

126

127

128

129

130

131

132

133 Reference

134 1. Hibino M, Otaki Y, Kobeissi E, Pan H, Hibino H, Taddese H, et al. Blood Pressure, Hypertension

135 and The Risk of Aortic Dissection Incidence and Mortality: results from the Japan-Specific Health

136 Checkups Study, the UK Biobank Study and a Meta-analysis of Cohort Studies. *Circulation*. 2021.

137 2. Hemani G, Zheng J, Elsworth B, Wade KH, Haberland V, Baird D, et al. The MR-Base platform

138 supports systematic causal inference across the human phenome. *Elife*. 2018;7.

139 3. Evangelou E, Warren HR, Mosen-Ansorena D, Mifsud B, Pazoki R, Gao H, et al. Genetic analysis

140 of over 1 million people identifies 535 new loci associated with blood pressure traits. *Nat Genet*.

141 2018;50(10):1412-25.

142 4. Wain LV, Verwoert GC, O'Reilly PF, Shi G, Johnson T, Johnson AD, et al. Genome-wide

143 association study identifies six new loci influencing pulse pressure and mean arterial pressure. *Nat*

144 *Genet*. 2011;43(10):1005-11.

145 5. Rapsomaniki E, Timmis A, George J, Pujades-Rodriguez M, Shah AD, Denaxas S, et al. Blood

146 pressure and incidence of twelve cardiovascular diseases: lifetime risks, healthy life-years lost, and

147 age-specific associations in 1.25 million people. *Lancet*. 2014;383(9932):1899-911.

148

149

150

151

152

153

154

155 **Legend**

156 **Figure 1** The association between modifiable risk factors and aortic dissection using the

157 inverse-variance weighted method.



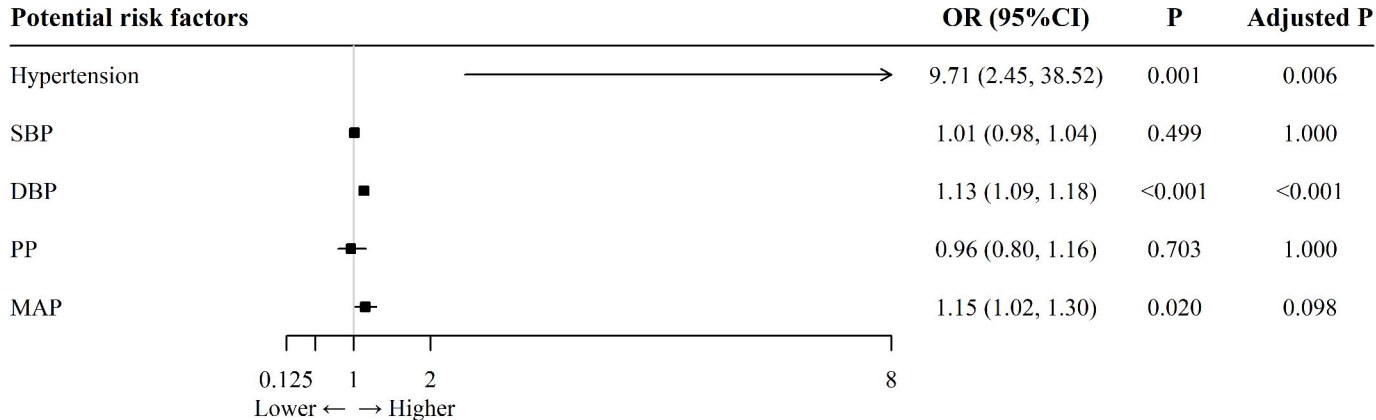

Source: https://medrxiv.org/content/10.1101/2022.02.06.22270435v1.full.pdf
